# Supplementary material
Source: PubMed Central journal article supplement (PMC3431694)
Supplement: supp_M112.368381_jbc.M112.368381-1.pdf [file supp_M112.368381_jbc.M112.368381-1.pdf]

A

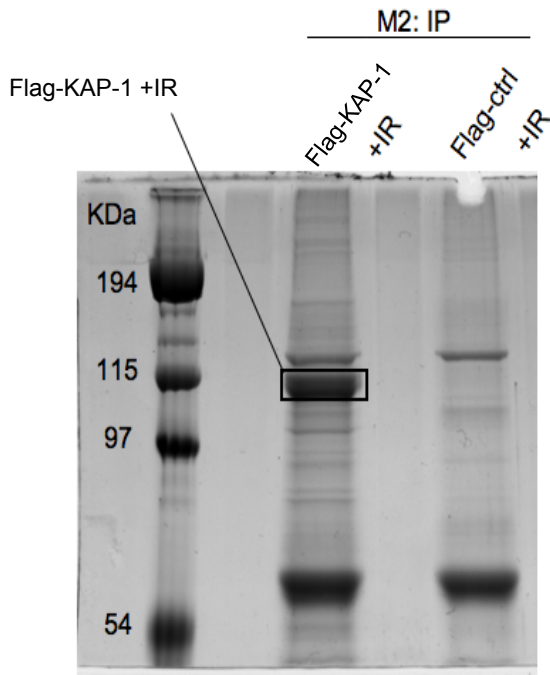

B

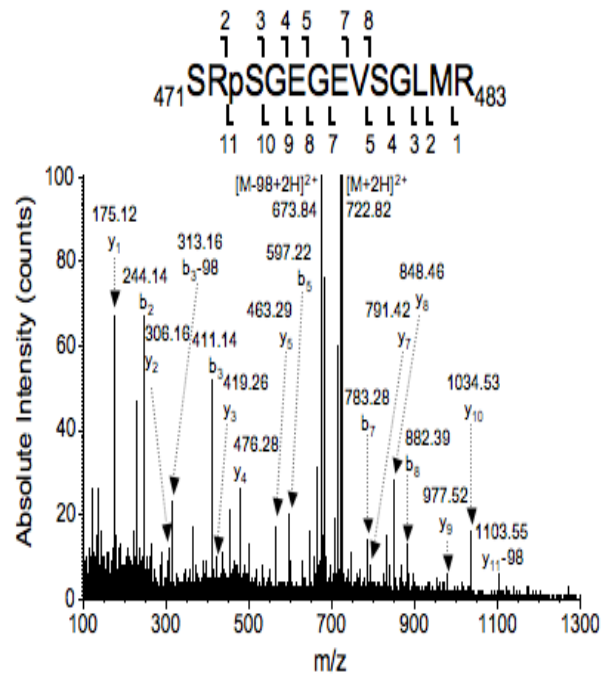

C

| Sequence                                     | Mascot<br>Score | Expectation<br>Value | Site | No.<br>Occasions<br>Identified <sup>§</sup> |
|----------------------------------------------|-----------------|----------------------|------|---------------------------------------------|
| Ac-AASAAAASAAAASAASGpSPGPGEGSAGGEKR/S        | 101             | $4.2 \times 10^{-8}$ | S19  | 16                                          |
| STAPSAASASASAAAASSPAGGGAEALELLEHCGVCR        | 56              | $6.8 \times 10^{-3}$ | S50  | 17                                          |
| K/LLASLVKR/L                                 | 58              | $2.4 \times 10^{-4}$ | S258 | 2                                           |
| K/QGpSGSSQPMEVQEGYGFSGDDPYSSAEPHVSQVGR/S     | 73              | $6.5 \times 10^{-5}$ | S437 | 4                                           |
| K/QSGSpSQPMEVQEGYGFSGDDPYSSAEPHVSQVGR/S      | 70              | $1.3 \times 10^{-4}$ | S440 | 4                                           |
| R/pSGEGEVSGLMR/K                             | 68              | $3.8 \times 10^{-5}$ | S473 | >25                                         |
| R/VpSLERLDLDTADSQPPVFK/V                     | 52              | $2.8 \times 10^{-3}$ | S489 | 8                                           |
| R/LAp(SPS)GSTSSGLEVVAPGTSAPGGGPGTLDDSATICR/V | 57              | $2.4 \times 10^{-3}$ | S594 | 17                                          |
|                                              |                 |                      | or   |                                             |
|                                              |                 |                      | S596 | 5                                           |
| R/LQEKLpSPPYSSPQEFAQDVGR/M                   | 79              | $6.0 \times 10^{-6}$ | S752 | 17                                          |
| K/LSPPYp(SS)PQEFAQDVGR/M                     | 68              | $8.6 \times 10^{-5}$ | S757 | 14                                          |
|                                              |                 |                      | or   |                                             |
|                                              |                 |                      | S756 | 8                                           |
| K/FAVLVEPPPMSLPGAGLp(SS)QELSGGPGDGP/-        | 41              | $7.1 \times 10^{-2}$ | S824 | 10                                          |
|                                              |                 |                      | or   |                                             |
|                                              |                 |                      | S823 | 4                                           |

**Supplementary Figure 1.** A. 293T cells were transfected with Flag alone or Flag-KAP-1 WT and harvested one hour after treatment with IR (10Gy). Flag-KAP-1 was immunoprecipitated, resolved on an SDS PAGE gel and stained with Colloidal Coomassie G-250. The band corresponding to Flag-KAP-1 was excised and used for mass spectrometric phospho-peptide and phospho-residue mapping. B. The doubly charged precursor peptide at m/z 722.82 which represents KAP-1<sub>471-483</sub> (doubly charged 1444.67 peptide) was selected for fragmentation in a nanoESI-MSMS analysis. The fragmented ions matched the sequence of the KAP-1<sub>471-483</sub> peptide where serine-473 is phosphorylated, the phospho-serine was detected between ions b<sub>2</sub> and b<sub>3</sub> and also redundantly between ions y<sub>10</sub> and y<sub>11-98</sub>. C. Detected KAP-1 phosphopeptides and phosphosites. <sup>§</sup> The number of times the phosphosite has been reported according to [www.phosphosite.org](http://www.phosphosite.org).

A

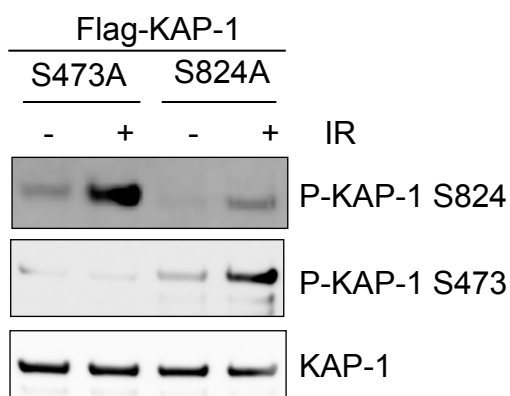

B

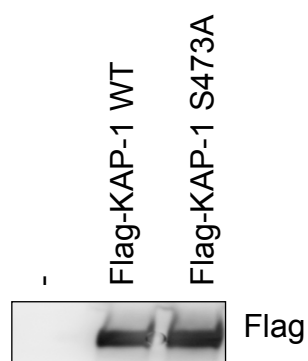

**Supplementary Figure 2.** A. HeLa cells were transfected with the indicated constructs and mock-treated or treated with 6 Gy IR. Cell extracts were taken 1 h post-IR and immunoblotting performed with the indicated antibodies. B. HeLa cells were treated as in A. (in the absence of IR) and immunoblotted with Flag antibodies.

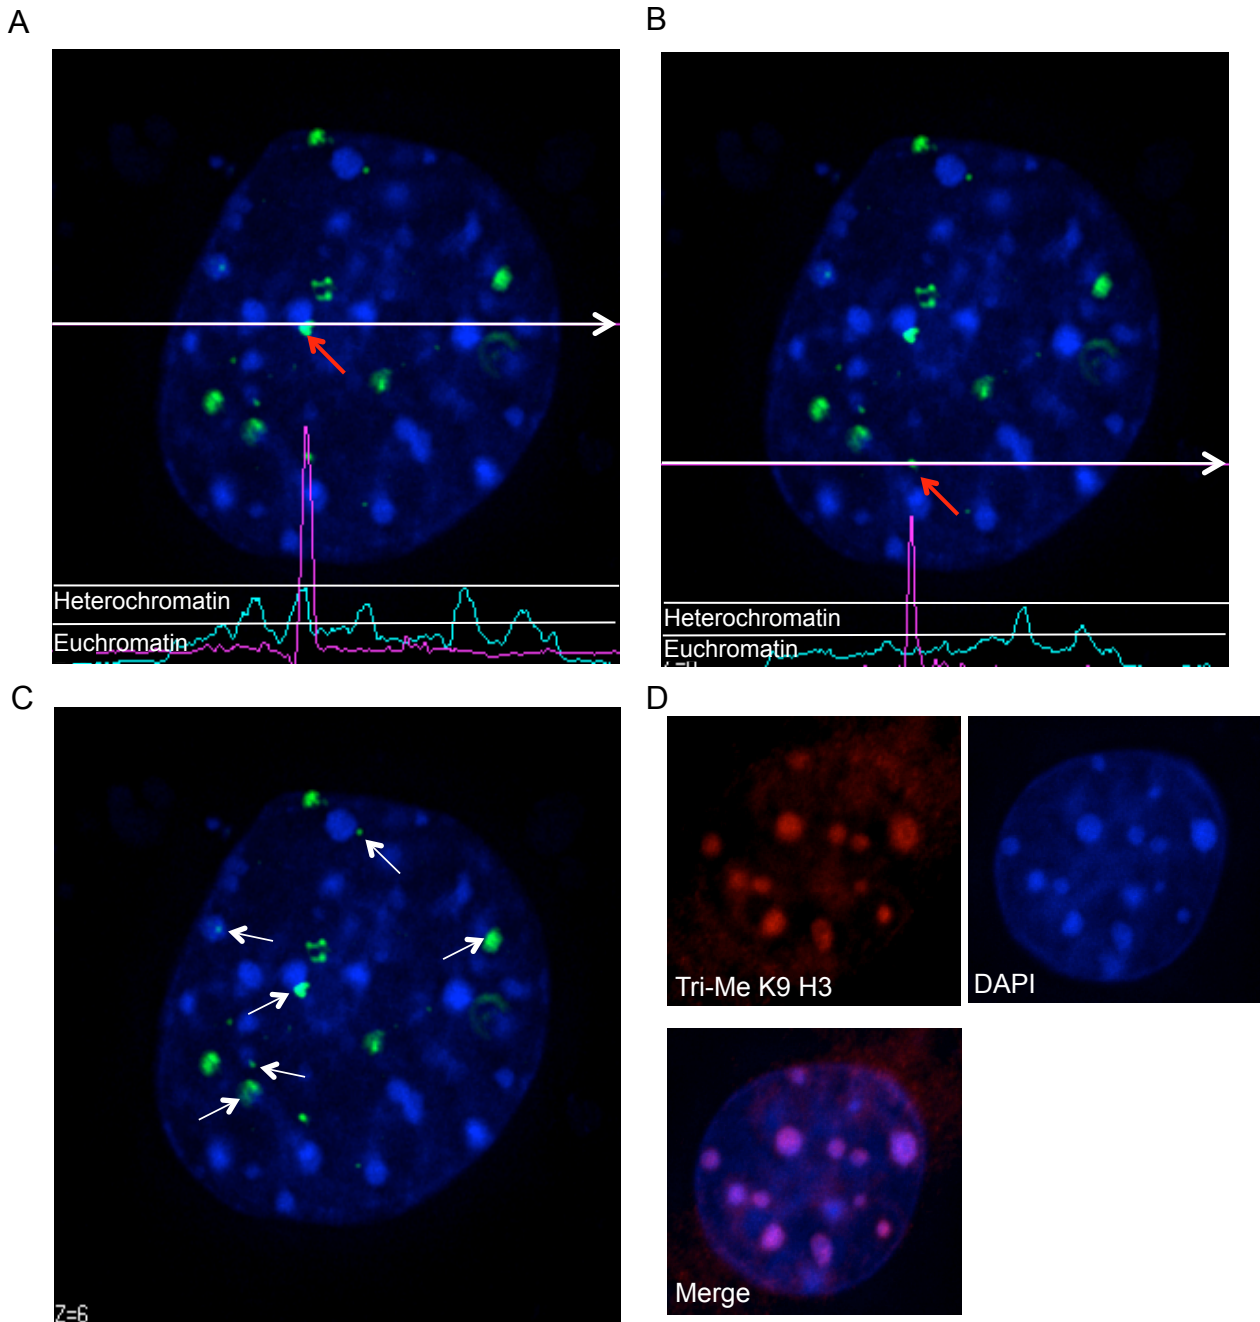

**Supplementary Figure 3.** Identifying  $\gamma$ H2AX foci associated with regions of heterochromatin. A-C. NIH3T3 cells were transfected with Flag-KAP-1 S473A. After 24 hours cells were treated with 2 Gy IR and harvested 24 hours post-IR. Cells were stained with  $\gamma$ H2AX (green) and DAPI (blue). High resolution images were captured using a Delta Vision PDV microscope, images were deconvolved using softWoRx Suite software. Signal intensity chromatographs are shown at the base of A. and B. Pink lines indicate  $\gamma$ H2AX signal and light blue lines indicate DAPI signal. A. Shows the chromatograph of a  $\gamma$ H2AX foci (indicated by a red arrow) associated with heterochromatin. B. Shows the chromatograph of a  $\gamma$ H2AX foci (indicated by a red arrow) not associated with heterochromatin. C. Shows an image with the heterochromatin-associated  $\gamma$ H2AX foci indicated by white arrows. D. NIH3T3 cells were fixed and stained with trimethylated K9 histone H3 and DAPI.

A

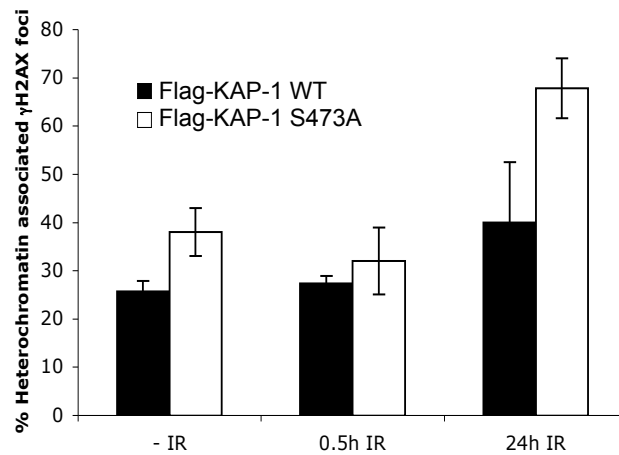

B

|                                            | KAP-1 WT - IR | KAP-1 WT 0.5hIR | KAP-1 WT 24h IR | KAP-1 S473A - IR | KAP-1 S473A 0.5h IR | KAP-1 S473A 24h IR |
|--------------------------------------------|---------------|-----------------|-----------------|------------------|---------------------|--------------------|
| Total $\gamma$ H2Ax foci/cell              | 0.38          | 29              | 1.82            | 0.82             | 29                  | 4.5                |
| $\gamma$ H2Ax foci/cell associated with HC | 0.10          | 7.83            | 0.69            | 0.31             | 9.67                | 3.03               |
| % HC associated $\gamma$ H2Ax foci         | 25.67         | 27.33           | 40              | 38               | 32                  | 67.8               |

**Supplementary Figure 4.** > 67% of unrepaired  $\gamma$ H2AX foci are associated with heterochromatin in cells expressing S473A. Growth-arrested confluent NIH3T3 cells were transfected with Flag-KAP-1 WT or S473A. After 24 hours cells were exposed to 2 Gy IR and harvested at either 0.5 or 24 hours post-IR. Cells were immunostained for  $\gamma$ H2AX and DAPI and were analysed as described in Supplementary Figure 3. Briefly, captured images were examined and the total number of  $\gamma$ H2AX foci and  $\gamma$ H2AX foci associated with heterochromatin were counted. From this the percentage of heterochromatin associated  $\gamma$ H2AX foci was calculated. A. Graphical representation of the percentage of heterochromatin associated  $\gamma$ H2AX foci. B. A table showing the data values collected.

A

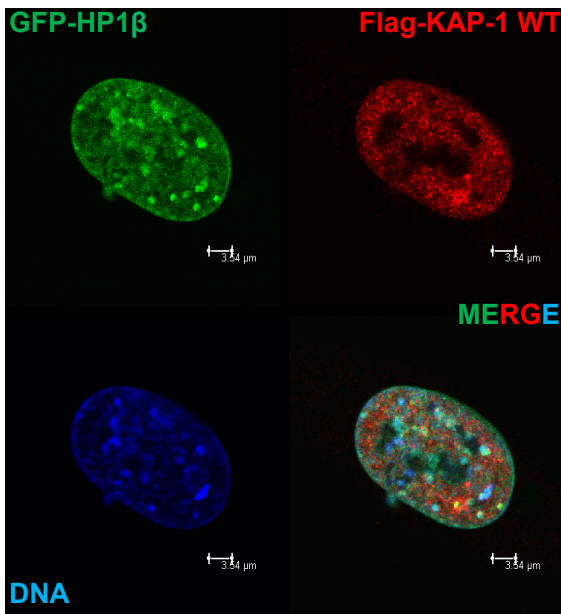

B

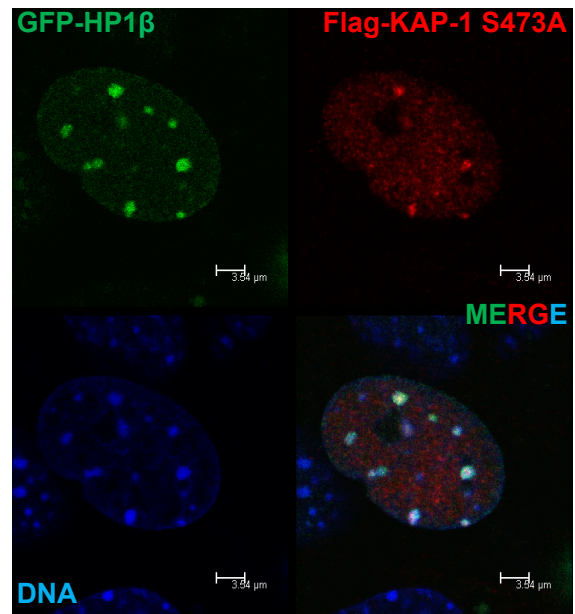

C

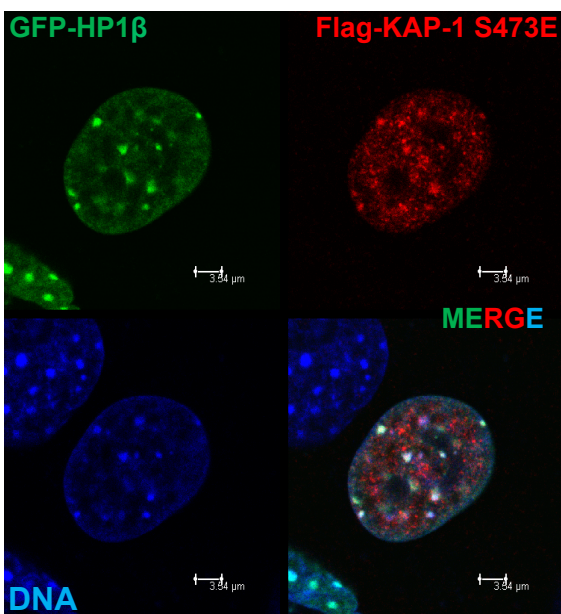

D

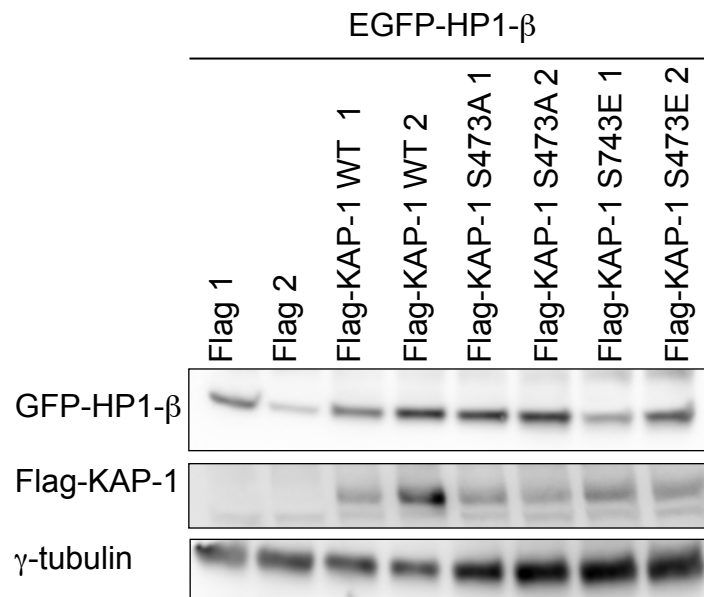

**Supplementary Figure 5.** Stable expression of EGFP-HP1-β and Flag-KAP-1 or, S473A in MEF cells. Immunofluorescence images of fixed MEFs stably expressing EGFP-HP1β and FLAG-KAP1 WT (A), S473A (B) or S473E (C). KAP-1 is visualised using anti-FLAG staining and DNA using DAPI. D. Expression of EGFP-HP1-β, Flag-KAP-1 WT, S473A and S473E in MEFs as shown by immunoblotting with the indicated antibodies.

A

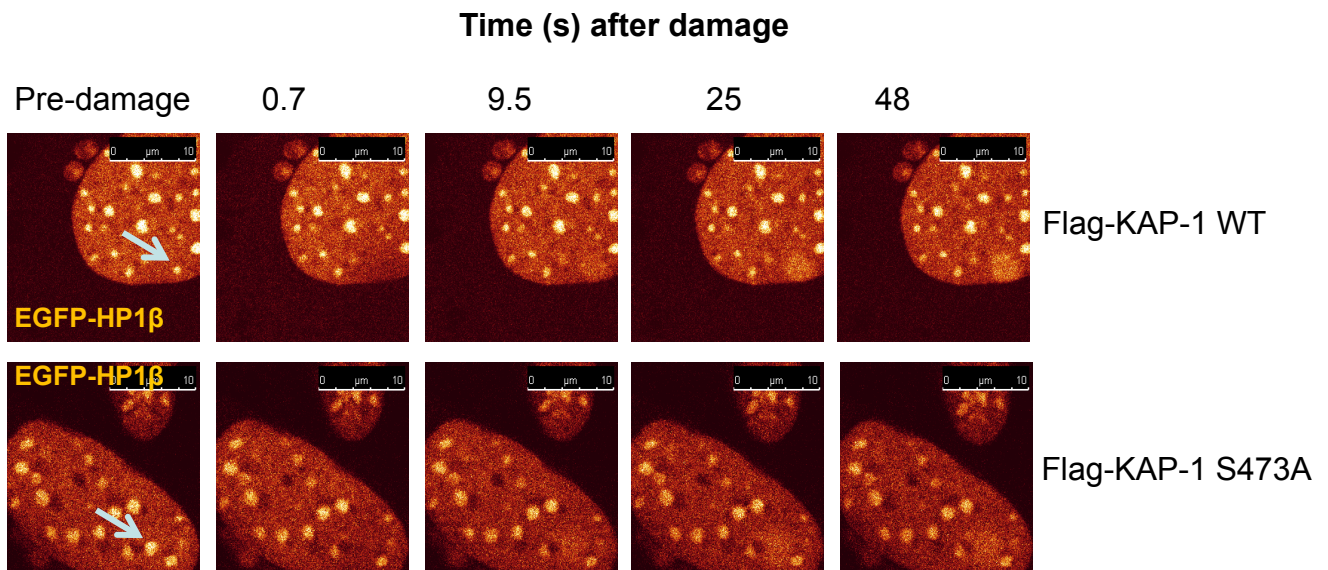

B

**Results of FRAP one phase association curve fits**

|                         |                       | <b>Undamaged</b> | <b>Damaged</b> | <b>95 % confidence intervals</b> |              |
|-------------------------|-----------------------|------------------|----------------|----------------------------------|--------------|
| <b>Flag-KAP-1 WT</b>    | Half time of recovery | 5.5              | 4.5            | 5.1 to 6.1                       | 4.3 to 4.8   |
|                         | Plateau of recovery   | 68.6             | 80.5           | 67.7 to 69.5                     | 79.9 to 81.1 |
| <b>Flag-KAP-1 S473A</b> | Half time of recovery | 5.06             | 4.4            | 4.7 to 5.5                       | 4.2 to 4.7   |
|                         | Plateau of recovery   | 74.6             | 79.4           | 73.8 to 75.5                     | 78.8 to 80.0 |

**Supplementary Figure 6.** EGFP-HP1- $\beta$  fluorescence recovery. A. Time-lapse imaging of EGFP-HP1 $\beta$  following 405nm laser activated DNA damage in living cells transiently expressing Flag-KAP1 WT or S473A. B. Results of the fits to the EGFP-HP1 $\beta$  FRAP recovery curves shown in Figure 5.

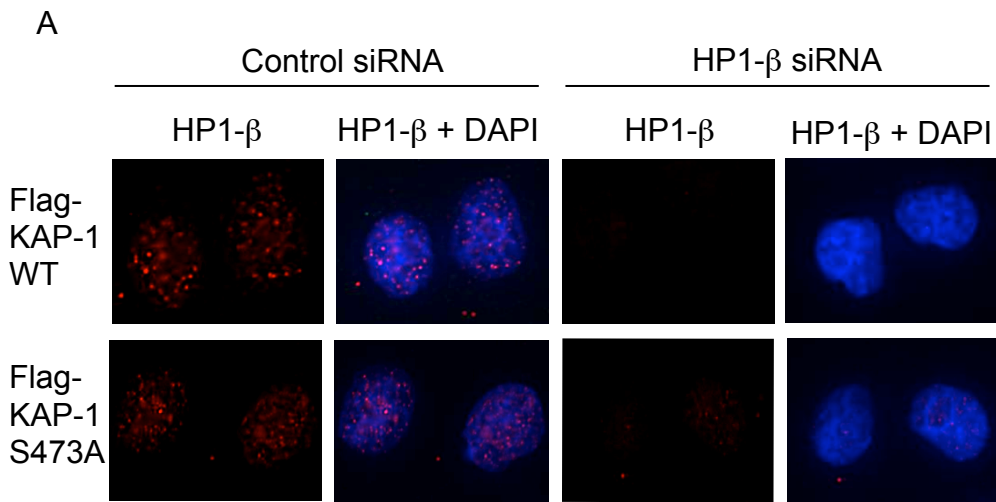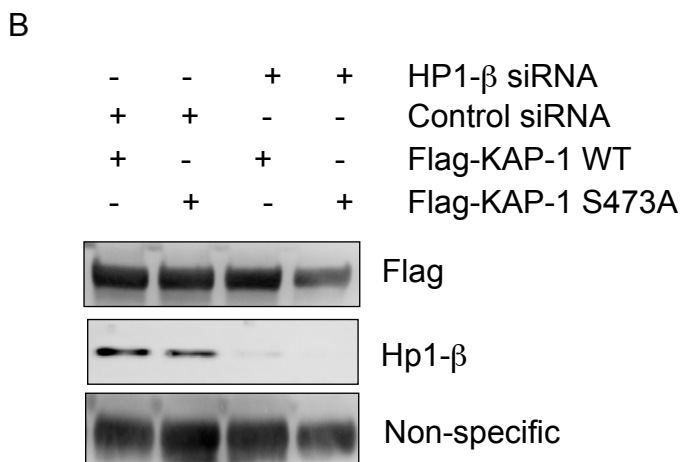

**Supplementary Figure 7.** A, B. HeLa cells were transfected with control or HP1- $\beta$  siRNA 24 h before transfection with Flag-KAP-1 WT or S473A. Cells were fixed or extracted 48 h post-siRNA transfection and immunofluorescence (A) or immunoblotting (B) was carried out with the indicated antibodies.
